# Supplementary material for: Nicotine oxidation by genetic variants of CYP2B6 and in human brain microsomes
Source: PubMed Central journal article supplement (PMC6411694; doi:10.1002/prp2.468), 2019-03-11

# Human Brain Microsome cis+trans NNO formation

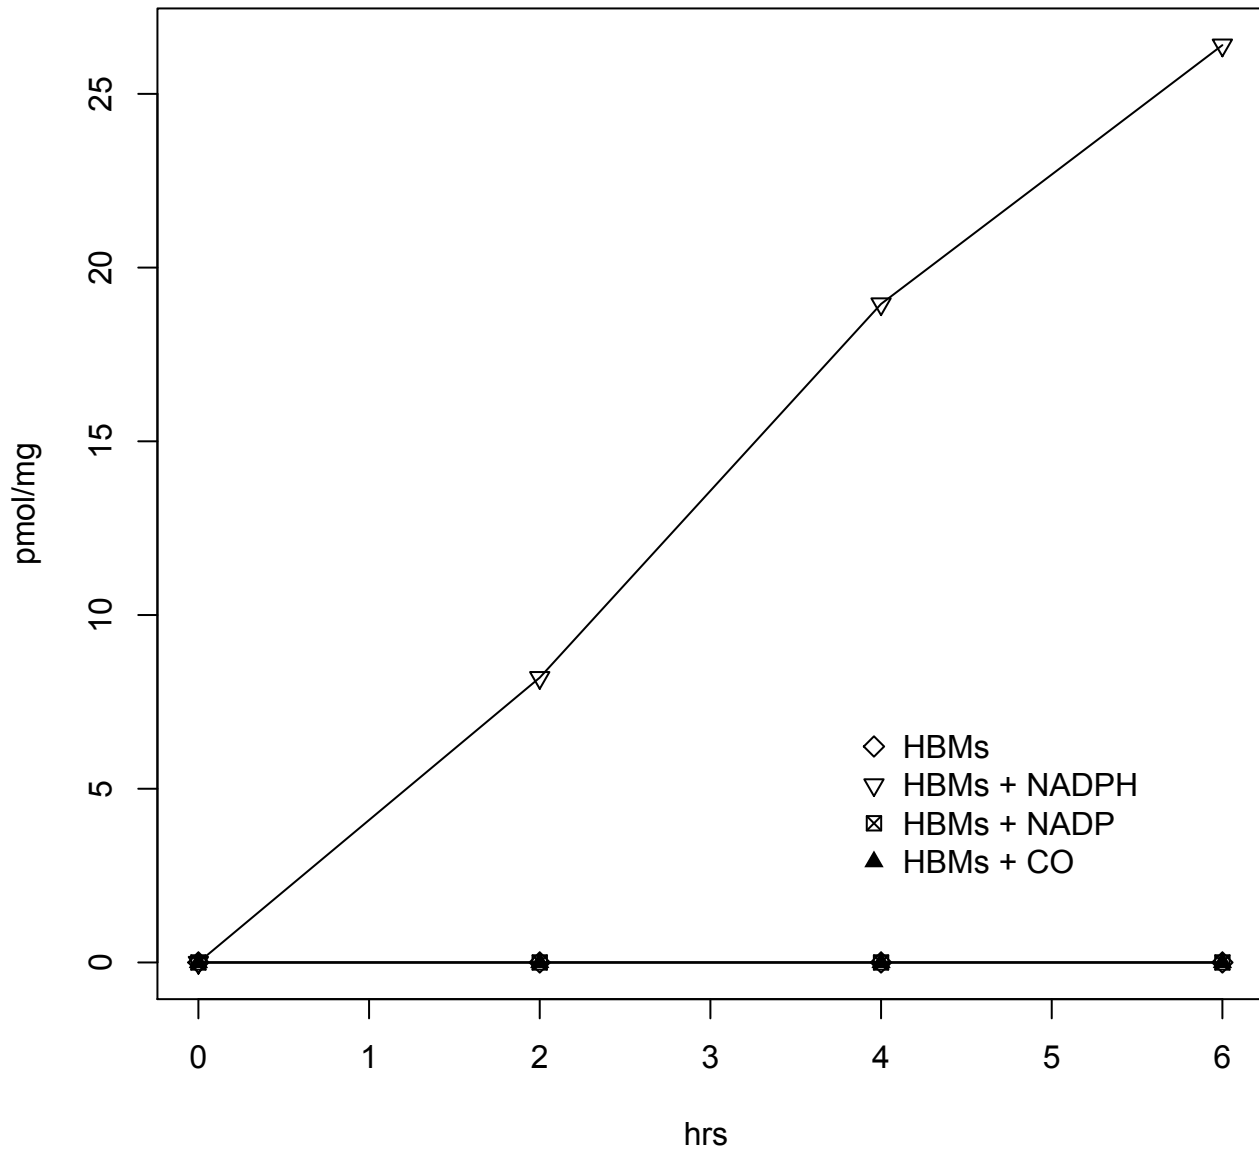

Supplement: PRP2-7-e00468-s001.pdf [file PRP2-7-e00468-s001.pdf]
